# Supplementary material for: The Human Orphan Nuclear Receptor Tailless (TLX, NR2E1) Is Druggable
Source: PubMed Central journal article supplement (PMC4060991; doi:10.1371/journal.pone.0099440), 2014-06-17
Supplement: pone.0099440.s004.pdf [file pone.0099440.s004.pdf]

**Supporting Information Table S1**

**NIH Clinical Collections (I & II)**

| <b>Hits from DSF not tested in Biolayer Interferometry</b>                                          | <b>Hits from DSF tested in Biolayer Interferometry</b>              |
|-----------------------------------------------------------------------------------------------------|---------------------------------------------------------------------|
| Pizotyline                                                                                          | Clotrimazole                                                        |
| Loxapine                                                                                            | Indatraline                                                         |
| Loratadine                                                                                          | Ethinylestradiol                                                    |
| Diphenylcyclopropenone                                                                              | Benzeneacetic acid, 2-[(2,6-dichlorophenyl)amino]-, monosodium salt |
| Paroxetine                                                                                          | Rosiglitazone maleate                                               |
| Maprotiline hydrochloride                                                                           | Benproperine phosphate                                              |
| Trimebutine maleate                                                                                 | Esomeprazole Mg                                                     |
| Lofepamine                                                                                          | Sertraline                                                          |
| Midazolam hydrochloride                                                                             | Pantoprazole sodium                                                 |
| Olanzapine                                                                                          | Torasemide                                                          |
| Moxifloxacin hydrochloride                                                                          | Valdecoxib                                                          |
| Cilastatin sodium                                                                                   | Rosiglitazone HCl                                                   |
| Voriconazole                                                                                        | Beclomethasone                                                      |
| Tadalafil                                                                                           | Corticosterone                                                      |
| Vinorelbine tartrate                                                                                | Norflex                                                             |
| Palonosetron hydrochloride                                                                          | Benzhexol hydrochloride                                             |
| 1-benzylimidazole                                                                                   | 19-Norethidrone acetate                                             |
| Annoylin                                                                                            | 6Alpha-Methyl-11Betahydroxyprogesterone                             |
| Chlorpromazine                                                                                      | 19-Norethindrone                                                    |
| Thioridazine                                                                                        | Procyclidine Hydrochloride                                          |
| Acetamide, 2-amino-N-(1-methyl-1,2diphenylethyl)                                                    | Tamoxifen                                                           |
| Trifluoperazine                                                                                     | Meclomen                                                            |
| (7R)-7,14,16-trihydroxy-3-methyl-3,4,5,6,7,8,9,10,11,12-decahydro-1H-2-benzoxacyclotetradecin-1-one | Testosterone                                                        |
| Nitrazepam                                                                                          | (R)-Fluoxetine Hydrochloride                                        |
| Rolipram                                                                                            | Sertraline                                                          |
| Amitriptyline hydrochloride                                                                         | Ketoconazole                                                        |
| Desipramine hydrochloride                                                                           | 6-alpha-hydrocortisol 21-acetate                                    |
| 3-(3-Chloro-5H-Dibenzo[B,F]Azepin-5-YL)-N,N-Dimethylpropan-1-Amine                                  |                                                                     |

## Prestwick Chemical Library

| Hits from DSF not tested in Biolayer Interferometry | Hits from DSF tested in Biolayer Interferometry |
|-----------------------------------------------------|-------------------------------------------------|
| Triflupromazine hydrochloride                       | Captopril                                       |
| Benoxinate hydrochloride                            | Ticlopidine hydrochloride                       |
| Oxethazaine                                         | Acetohexamide                                   |
| Chlorpromazine hydrochloride                        | Minaprine dihydrochloride                       |
| Diphenhydramine hydrochloride                       | Dibucaine                                       |
| Nicergoline                                         | Hydralazine hydrochloride                       |
| Imipramine hydrochloride                            | Phenelzine sulfate                              |
| Amitriptyline hydrochloride                         | Flavoxate hydrochloride                         |
| Thioridazine hydrochloride                          | Iproniazide phosphate                           |
| Alverine citrate salt                               | Fendiline hydrochloride                         |
| Norethindrone                                       | Labetalol hydrochloride                         |
| Nortriptyline hydrochloride                         | Mefexamide hydrochloride                        |
| Ethacrynic acid                                     | Clemizole hydrochloride                         |
| Praziquantel                                        | Glibenclamide                                   |
| Catharanthine                                       | Androsterone                                    |
| Clomipramine hydrochloride                          | Amlodipine                                      |
| Asenapine maleate                                   | Bisacodyl                                       |
| Quinidine hydrochloride monohydrate                 | Epiandrosterone                                 |
| Homochlorcyclizine dihydrochloride                  | Benfluorex hydrochloride                        |
| Perhexiline maleate                                 | Bepriidil hydrochloride                         |
| Oxybutynin chloride                                 | Fusidic acid sodium salt                        |
| Pimethixene maleate                                 | Fentiazac                                       |
| Clemastine fumarate                                 | Papaverine hydrochloride                        |
| Mebeverine hydrochloride                            | Cilostazol                                      |
| Trifluoperazine dihydrochloride                     | Fluoxetine hydrochloride                        |
| Clofilium tosylate                                  | Gliclazide                                      |
| Fluphenazine dihydrochloride                        | Prenylamine lactate                             |
| Testosterone propionate                             | Medrysone                                       |
| Chlorprothixene hydrochloride                       | Flunixin meglumine                              |
| Suloctidil                                          | <b>Dydrogesterone (ccrp3)</b>                   |
| Zotepine                                            | Diethylstilbestrol                              |
| Dibenzepine hydrochloride                           | Estropipate                                     |
| Corticosterone                                      | Butamben                                        |
| Cyclobenzaprine hydrochloride                       | 3-alpha-hydroxy-5-beta-androstan-17-one         |
| Dequalinium dichloride                              | <b>Famprofazone (ccrp1)</b>                     |
| Quetiapine                                          | Finasteride                                     |
| Prochlorperazine dimaleate                          | Cloperastine hydrochloride                      |
| Metixene hydrochloride                              | Isocarboxazid                                   |
| Terconazole                                         | Pyrrithyldione                                  |
| Azelastine hydrochloride                            | Fosfosal                                        |
| Pentamidine isethionate                             | Butylparaben                                    |
| Mirtazapine                                         | Monobenzone                                     |

|                                                                                                                                |                                 |
|--------------------------------------------------------------------------------------------------------------------------------|---------------------------------|
| N-[4-[4-(2-methoxyphenyl)piperazin-1-yl]butyl]naphthalene-2-carboxamide dihydrochloride                                        | Nylidrin                        |
| Monensin sodium salt<br>Tazobactam                                                                                             | Propofol<br>Deoxycorticosterone |
| Butirosin disulfate salt                                                                                                       | Urosiol                         |
| Glimepiride                                                                                                                    | Canrenone                       |
| Suxibuzone                                                                                                                     | Piperidolate hydrochloride      |
| Atractyloside potassium salt                                                                                                   | Nandrolone                      |
| Adenosine 5'-(trihydrogen diphosphate), 5'-5'-ester with 3-(aminocarbonyl)-1-β-D-ribofuranosylpyridinium hydroxide, inner salt | Alfaxalone                      |
| Warfarin                                                                                                                       | Losartan                        |
| Pempidine tartrate                                                                                                             |                                 |
| Thimerosal                                                                                                                     |                                 |
| Auranofin                                                                                                                      |                                 |
| Suprofen                                                                                                                       |                                 |
| Felbinac                                                                                                                       |                                 |
| Oxalamine citrate salt                                                                                                         |                                 |
| Diloxanide furoate                                                                                                             |                                 |
| Iocetamic acid                                                                                                                 |                                 |
| Nitrendipine                                                                                                                   |                                 |
| Thioperamide maleate                                                                                                           |                                 |
| Quinapril hydrochloride                                                                                                        |                                 |
| Paroxetine hydrochloride                                                                                                       |                                 |
| Tolmetin sodium salt dehydrate                                                                                                 |                                 |
| S(-)Eticlopride hydrochloride                                                                                                  |                                 |
| Theobromine                                                                                                                    |                                 |
| Loversol                                                                                                                       |                                 |
| Rabeprazole Sodium salt                                                                                                        |                                 |
| Enilconazole                                                                                                                   |                                 |
| Darifenacin hydrobromide                                                                                                       |                                 |
| Pivmecillinam hydrochloride                                                                                                    |                                 |
| Pizotifen malate                                                                                                               |                                 |
| Deptropine citrate                                                                                                             |                                 |
| Carprofen                                                                                                                      |                                 |
| Vardenafil                                                                                                                     |                                 |
| Ambrisentan                                                                                                                    |                                 |
| Desloratadine                                                                                                                  |                                 |
| Ibudilast                                                                                                                      |                                 |
| Benztropine mesylate                                                                                                           |                                 |
| Bosentan                                                                                                                       |                                 |

## Selleck Library

| Hits from DSF not tested in Biolayer Interferometry                                                 | Hits from DSF tested in Biolayer Interferometry |
|-----------------------------------------------------------------------------------------------------|-------------------------------------------------|
| Deforolimus                                                                                         | Masitinib                                       |
| ZSTK474                                                                                             | Roscovitine (CYC202)                            |
| NVP-ADW742                                                                                          | TGX-221                                         |
| SGX-523                                                                                             | Raloxifene                                      |
| Everolimus (RAD001)                                                                                 | 2-Methoxyestradiol                              |
| MLN8237                                                                                             | Cinacalcet hydrochloride                        |
| Danoprevir                                                                                          | Progesterone                                    |
| Ketoconazole                                                                                        | Fluvastatin Sodium                              |
| Loratadine                                                                                          | Phloretin                                       |
| Daptomycin                                                                                          | CYT387                                          |
| Aurora A Inhibitor I                                                                                |                                                 |
| Vinorelbine                                                                                         |                                                 |
| N5-(6-Aminohexyl)-3-isopropyl-N7-benzylpyrazolo[1,5-a]pyrimidine-5,7-diamine                        |                                                 |
| Clotrimazole                                                                                        |                                                 |
| Testosterone cypionate                                                                              |                                                 |
| Loperamide hydrochloride                                                                            |                                                 |
| OSI-027                                                                                             |                                                 |
| 6,7-Dihydro-4-hydroxy-3-(2'-hydroxy[1,1'-biphenyl]-4-yl)-6-oxo-thieno[2,3-b]pyridine-5-carbonitrile |                                                 |

NCI Mechanistic Set

| Hits from DSF not tested in Biolayer Interferometry                                                                                                                                                                                                                                                                                                         | Hits from DSF tested in Biolayer Interferometry                                                                                                                                                               |
|-------------------------------------------------------------------------------------------------------------------------------------------------------------------------------------------------------------------------------------------------------------------------------------------------------------------------------------------------------------|---------------------------------------------------------------------------------------------------------------------------------------------------------------------------------------------------------------|
| Dichlorocadmium                                                                                                                                                                                                                                                                                                                                             | 1-(2-chloroethyl)-1-nitroso-3-[(1-oxidopyridin-1-ium-3-yl)methyl]urea                                                                                                                                         |
| [acetyl(methylcarbamoyl)amino] N-methylcarbamate                                                                                                                                                                                                                                                                                                            | (E)-2-(benzoyl)-3-naphthalen-2-ylprop-2-enenitrile                                                                                                                                                            |
| 2-hydroxytetradecanoic acid                                                                                                                                                                                                                                                                                                                                 | 2-(chloromethyl)-1,3-dinitro-5-(trifluoromethyl)benzene                                                                                                                                                       |
| Kauroic acid                                                                                                                                                                                                                                                                                                                                                | 2-(4-methylphenyl)sulfonyl-5-nitrofuran                                                                                                                                                                       |
| 1-[(2-chlorophenyl)-di(phenyl)methyl]imidazole                                                                                                                                                                                                                                                                                                              | 4-(morpholin-4-ylmethyl)-1-phenylnon-1-en-3-one                                                                                                                                                               |
| Chlorogold; Triethylphosphane                                                                                                                                                                                                                                                                                                                               | 4-[[[(8-hydroxyquinolin-7-yl)-phenylmethyl]amino]benzoic acid                                                                                                                                                 |
| Tributyl(chloro)plumbane                                                                                                                                                                                                                                                                                                                                    | 7,8,8a,9-tetrachloro-1,4a-dimethyl-7-propan-2-yl-2,3,4,4b,5,6,8,9,10,10a-decahydrophenanthrene-1-carboxylic acid                                                                                              |
| acetyloxy-(2,3,4,5,6-pentamethylphenyl)mercury                                                                                                                                                                                                                                                                                                              | [(E,6R)-6-[(2S,8S,9R,10R,13R,14S,16R,17R)-2,16-dihydroxy-4,4,9,13,14-pentamethyl-3,11-dioxo-2,7,8,10,12,15,16,17-octahydro-1H-cyclopenta[a]phenanthren-17-yl]-6-hydroxy-2-methyl-5-oxohept-3-en-2-yl] acetate |
| 2-[(1,3-dioxinden-2-yl)-(4-nitrophenyl)methyl]indene-1,3-dione                                                                                                                                                                                                                                                                                              |                                                                                                                                                                                                               |
| copper 3-(4-dimethylaminophenyl)prop-2-enoate                                                                                                                                                                                                                                                                                                               |                                                                                                                                                                                                               |
| Acetyloxymercury; Phenanthrene                                                                                                                                                                                                                                                                                                                              |                                                                                                                                                                                                               |
| [acetyloxy-di(phenyl)plumbyl] acetate                                                                                                                                                                                                                                                                                                                       |                                                                                                                                                                                                               |
| benzoyloxy-[[5-(benzoyloxymercuriomethyl)-1,4-dioxan-2-yl]methyl]mercury                                                                                                                                                                                                                                                                                    |                                                                                                                                                                                                               |
| 2-[6-[[2-[5-[5-[6-hydroxy-6-(hydroxymethyl)-3,5-dimethyloxan-2-yl]-3-methyloxolan-2-yl]-5-methyloxolan-2-yl]-9-methoxy-2,4,10-trimethyl-1,6-dioxaspiro[4.5]decan-7-yl]methyl]-3-methyloxan-2-yl]propanoic acid                                                                                                                                              |                                                                                                                                                                                                               |
| 1-[10-(4-amino-2-methylquinolin-1-ium-1-yl)decyl]-2-methylquinolin-1-ium-4-amine chloride                                                                                                                                                                                                                                                                   |                                                                                                                                                                                                               |
| (2S)-N-[(2R)-1-[[[(3S,6S,8S,12S,13R,16S,17R,20S,23S)-13-[(2S)-butan-2-yl]-12-hydroxy-20-[(4-methoxyphenyl)methyl]-6,17,21-trimethyl-3-(2-methylpropyl)-2,5,7,10,15,19,22-hepta-oxo-8-propan-2-yl-9,18-dioxo-1,4,14,21-tetrazabicyclo[21.3.0]hexacosan-16-yl]amino]-4-methyl-1-oxopentan-2-yl]-1-[(2S)-2-hydroxypropanoyl]-N-methylpyrrolidine-2-carboxamide |                                                                                                                                                                                                               |

|                                                                                                                                                                                                                                                                                                                                                                                                    |  |
|----------------------------------------------------------------------------------------------------------------------------------------------------------------------------------------------------------------------------------------------------------------------------------------------------------------------------------------------------------------------------------------------------|--|
| 1-[4-[2-[4-[2-hydroxy-3-(2,4,4-trimethylpentan-2-ylamino)propoxy]phenyl]propan-2-yl]phenoxy]-3-(2,4,4-trimethylpentan-2-ylamino)propan-2-ol hydrochloride                                                                                                                                                                                                                                          |  |
| [5-hydroxy-6-[2-hydroxy-3-[[4-[[2-hydroxy-7-[3-hydroxy-5-methoxy-6,6-dimethyl-4-(5-methyl-1H-pyrrole-2-carbonyl)oxyoxan-2-yl]oxy-8-methyl-4-oxochromen-3-yl]carbonyl]-3-methyl-1H-pyrrole-2-carbonyl]amino]-8-methyl-4-oxochromen-7-yl]oxy-3-methoxy-2,2-dimethylloxan-4-yl] 5-methyl-1H-pyrrole-2-carboxylate                                                                                     |  |
| Antibiotic 382B                                                                                                                                                                                                                                                                                                                                                                                    |  |
| N,N'-di(acridin-9-yl)octane-1,8-diamine                                                                                                                                                                                                                                                                                                                                                            |  |
| Rapamycin                                                                                                                                                                                                                                                                                                                                                                                          |  |
| N-[1-[[1-[[1-[[1-[[1-[[1-[[1-[[1-[[1-[[2-hydroxyethyl(methyl)amino]propan-2-ylamino]-2-methyl-1-oxopropan-2-yl]amino]-2-methyl-1-oxopropan-2-yl]amino]-1-oxopropan-2-yl]amino]-3-methyl-1-oxopentan-2-yl]amino]-2-methyl-1-oxopropan-2-yl]amino]-2-methyl-1-oxopropan-2-yl]amino]-1-oxopropan-2-yl]-4-methyl-1-[1-(2-methyldecanoyl)pyrrolidine-2-carbonyl]-6-(2-oxobutyl)piperidine-2-carboxamide |  |

NCI Diversity Set

| Hits from DSF not tested in Biolayer Interferometry                                                                     | Hits from DSF tested in Biolayer Interferometry                                |
|-------------------------------------------------------------------------------------------------------------------------|--------------------------------------------------------------------------------|
| 4-[(6-chloro-2-methoxyacridin-9-yl)amino]-5-methyl-2-propan-2-ylphenol                                                  | 5,6-dichloro-2-[3-(trifluoromethyl)phenyl]-1H-imidazo[4,5-b]pyrazine           |
| 2-(4-hydroxy-3-methoxyphenyl)-6-(3-methylanilino)-4-oxo-2,3-dihydro-1,3-thiazine-5-carbonitrile                         | 2-(4-chlorophenyl)-6-methoxyquinoline-4-carboxylic acid                        |
| Succinic acid                                                                                                           | 2-[(4-chloro-1-hydroxynaphthalene-2-carbonyl)amino]-2-methylpropanoic acid     |
| (Z)-but-2-enedioic acid; 1-methyl-4-(8-methylsulfanyl-5,6-dihydrobenzo[b][1]benzothiepin-6-yl)piperazine                | (E)-2-diethoxyphosphoryl-3-[5-(2,4-difluorophenyl)furan-2-yl]prop-2-enenitrile |
| 4',4',6'-trimethyl-N-phenylspiro[1,3,4-oxadiazole-5,2'-7-oxabicyclo[4.1.0]heptane]-2-imine                              | 1-(3,8,8-trimethyl-6,7-dihydro-5H-naphthalen-2-yl)ethanone                     |
| 1-[(4-chlorophenoxy)-(2-ethylaziridin-1-yl)phosphoryl]-2-ethylaziridine                                                 | 4-(2-chloroacetyl)-6,7-dimethyl-1,3-dihydroquinoxalin-2-one                    |
| 6-(2-chloroanilino)-4-oxo-2-pyridin-4-yl-2,3-dihydro-1,3-thiazine-5-carbonitrile                                        | 5-methylsulfanyl-6-phenylsulfanyl-2H-1,2,4-triazin-3-one                       |
| N-[(1Z)-{[3-(2,6-dichlorophenyl)-5-methyl-1,2-oxazol-4-yl]formohydrazido}(methylsulfanyl)methylidene]benzenesulfonamide | 3-dibutoxyphosphoryl-3,5,5-trimethylcyclohexan-1-one                           |
| (Z)-2-[4-(3-ethyl-5,5,8,8-tetramethyl-6,7-dihydronaphthalen-2-yl)-1,3-thiazol-2-yl]-N'-hydroxyethanimidamide            | [cyclohexen-1-yloxy(phenyl)phosphoryl]benzene                                  |
| 2-[2-[(6-oxobenzo[c]isochromen-2-yl)carbamoyl]phenyl]benzoic acid                                                       | 5-morpholin-4-yl-1,5-di(phenyl)pent-1-en-3-one                                 |
| 6-penta-1,3-diynylpyran-2-one                                                                                           | 2-arsonobenzoic acid                                                           |
| Glutathione                                                                                                             | 5,5-dimethyl-6H-benzo[c]acridin-6-ol                                           |
| 2-carbazol-9-ylbenzoic acid                                                                                             | Benzotriazole,4,5,6,7-tetrachloro- (6CI,7CI); 4,5,6,7-Tetrachlorobenzotriazole |
| 5-(2-naphthylmethylene)-1,3-dihydropyrimidine-2,4,6-trione                                                              | ethyl 4-[(2-hydroxynaphthalen-1-yl)methyl]piperazine-1-carboxylate             |
| Barbituric acid                                                                                                         | 1-(3-methylphenoxy)-3-[4-(4-methylphenyl)piperazin-1-yl]propan-2-ol            |
| 2-Methoxy-5H-pyrido(3',2':5,6)(1,4)thiazino(2,3-b)quinoxaline                                                           | 3-[(3-ethoxy-4-hydroxyphenyl)methylidene]-5-(4-methoxyphenyl)furan-2-one       |
| (1-tert-butyl-5-phenylpyrrol-3-yl)-phenylmethanone                                                                      | diethyl 4-(4-methoxyphenyl)-2,6-dimethylpyridine-3,5-dicarboxylate             |
| ethyl (E)-2-cyano-3-[2-(ethylamino)pyrazolo[1,5-a]pyridin-3-yl]prop-2-enoate                                            | [2-(4-chlorophenyl)quinolin-4-yl]-piperidin-2-ylmethanol                       |
| N-(4,7-Dihydroxy-8-methyl-2-oxo-2H-chromen-3-yl)-2,2-dimethylchromane-6-carboxamide                                     | 6-bromo-N-naphthalen-1-yl-1,3-benzodioxole-5-carboxamide                       |
| N-(2,5-dimethoxyphenyl)-2-hydroxydibenzofuran-3-carboxamide                                                             | N,N-dimethyl-1,3-dioxoisindole-2-sulfonamide                                   |
| diethyl 2-acetamido-2-dodecylpropanedioate                                                                              |                                                                                |
| 4-oxo-4-pyren-1-ylbutanoic acid                                                                                         |                                                                                |

|                                                                          |  |
|--------------------------------------------------------------------------|--|
| 1,1,3,3-tetra(phenyl)urea                                                |  |
| (4E)-4-(3H-1,3-benzothiazol-2-ylidene)-3-hydroxycyclohexa-2,5-dien-1-one |  |



## NCI Natural Products

| Hits from DSF not tested in Biolayer Interferometry                                                                | Hits from DSF tested in Biolayer Interferometry                                                                                                                                                                                                               |
|--------------------------------------------------------------------------------------------------------------------|---------------------------------------------------------------------------------------------------------------------------------------------------------------------------------------------------------------------------------------------------------------|
| (1R,4aS,10aR)-1,4a-dimethyl-7-(propan-2-yl)-1,2,3,4,4a,9,10,10a-octahydrophenanthrene-1-carboxylic acid            | (5E,9E)-4,12-dihydroxy-2,6,10-trimethyl-14-methylidene-16-oxabicyclo[11.3.1]heptadeca-5,9-dien-15-one                                                                                                                                                         |
| 3aR,5R,5aR,8aR,9S,9aS)-9-hydroxy-5,8a-dimethyl-1-methylidene-3a,4,5,5a,9,9a-hexahydroazuleno[6,7-b]furan-2,8-dione | Methyl (1aS,1bS,3aR,4R,7aS,9aS)-1b-hydroxy-4,7a-dimethyl-9-oxo-9a-propan-2-yl-2,3,3a,5,6,7-hexahydro-1aH-phenanthro[1,2-b]oxirene-4-carboxylate                                                                                                               |
| 13-Methoxy-3,3-dimethyl-11-(3-methyl-2-butenyl)-7a,12a-dihydro-3H,7H-(1)benzofuro(3,2-c)pyrano(3,2-g)chromen-10-ol | sodium 2-[(3S,6R)-6-[(5R,7R,9R,10R)-2-[5-[(3S,5R)-5-[(2S,3S,5R,6R)-6-hydroxy-6-(hydroxymethyl)-3,5-dimethyloxan-2-yl]-3-methyloxolan-2-yl]-5-methyloxolan-2-yl]-9-methoxy-2,4,10-trimethyl-1,6-dioxaspiro[4.5]decan-7-yl]methyl]-3-methyloxan-2-yl]propanoate |

## Maybridge Hitfinder Library

| <b>Hits from DSF tested in Biolayer Interferometry</b>                                                                                    |
|-------------------------------------------------------------------------------------------------------------------------------------------|
| 6-nitro-2-(2-thienyl)-1,2,3,4-tetrahydroquinazolin-4-one                                                                                  |
| N1-(5,7-dimethyl[1,8]naphthyridin-2-yl)-4-(trifluoromethyl)benzamide                                                                      |
| 3-(2,3-dihydro-1,4-benzodioxin-6-ylamino)-2(propylsulfonyl)acrylonitrile                                                                  |
| 2- {[4-(5-nitropyridin-2-yl)piperazino]carbonyl} cyclobutanecarboxylic acid                                                               |
| N1-(2-{2-[2-(acetylamino)phenoxy]ethoxy}phenyl)acetamide                                                                                  |
| 2-benzo[b]furan-2-yl-3-(4-fluorophenyl)-1,3-thiazolan-4-one                                                                               |
| N1-(2,4-dichlorophenyl)-2-hydrazino-2-oxoacetamide                                                                                        |
| ethyl 2-methyl-4-(morpholinofulfonyl)-1,5-diphenyl-1H-pyrrole-3-carboxylate                                                               |
| N-{3-[3-(acetylamino)phenoxy]propyl}-3-(2-chloro-6-fluorophenyl)-5-methyl-4-isoxazolecarboxamide                                          |
| 5-methyl-2-nitro-N'-[(3,4,5-trimethoxyphenyl)methylene]benzohydrazide                                                                     |
| N-[2-hydroxy-3-(4-methoxyphenoxy)propyl]cyclobutanecarboxamide                                                                            |
| N4-(3,4-dimethoxyphenethyl)-6-methylpyrimidine-2,4-diamine                                                                                |
| 3,5-di(acetyloxy)-2-(1,3-benzothiazol-2-yl)tetrahydro-2H-pyran-4-yl acetate                                                               |
| N1-[2,2,2-trifluoro-1-(4-fluoroanilino)-1-(trifluoromethyl)ethyl]-2-ethoxybenzamide                                                       |
| N3-(3,4-dichlorobenzyl)-2- {[3-(trifluoromethyl)phenyl]thio} nicotinamide                                                                 |
| 2-([3-(4-chlorophenyl)-1,2,4-oxadiazol-5-yl]methyl)sulfanyl)acetic acid                                                                   |
| 5-chloro-2-[(2-chloro-6-fluorobenzyl)sulfanyl]-1-isopropyl-1H-benzimidazole                                                               |
| 1-bromo-2-methoxynaphthalene                                                                                                              |
| 3-[(4-chlorophenyl)sulfonyl]-1,3-thiazolane-2-carbohydrazide                                                                              |
| 2-[(5- {[1-(naphthylmethyl)thio]methyl}-4-phenyl-4H-1,2,4-triazol-3-yl)thio]-3-nitropyridine                                              |
| [1-(4-methoxyphenyl)-5-methyl-1H-pyrazol-4-yl](piperidino)methanone                                                                       |
| methyl 3,5-dibromo-2-(2-methoxy-2-oxoethoxy)benzoate                                                                                      |
| 1-[3-([1-(3,4-dimethoxyphenyl)-1H-1,2,3,4-tetraazol-5-yl]thio)methyl]-4-methoxyphenyl]ethan-1-one                                         |
| Trisodium 8-hydroxypyrene-1,3,6-trisulfonate                                                                                              |
| 4-cyclohexyl-1-methyl-2,3,4,5-tetrahydro-1H-1,4-benzodiazepine-2,5-dione                                                                  |
| 2-[(2-methyl-3-furyl)carbonyl]-3-[(methyl{4-[(5-nitropyridin-2-yl)oxy]phenyl}oxo-lambda-6-sulfanylidene)amino]acrylonitrile               |
| 2-chloro-6-fluoro-N'-[2-(trifluoromethyl)phenyl]benzohydrazide                                                                            |
| 4-amino-2- {[3-(trifluoromethyl)benzyl]sulfanyl}-5-pyrimidinecarboxylic acid                                                              |
| methyl 3- {1-[3-hydroxy-4-(hydroxymethyl)tetrahydrofuran-2-yl]-2,4-dioxo-1,2,3,4-tetrahydropyrimidin-5-yl} acrylate                       |
| 5-nitro-2- {[5-(2-thienyl)-4H-1,2,4-triazol-3-yl]thio}-1,3-thiazole                                                                       |
| 2-(2,3-dihydro-1,3-benzoxazol-2-yl)-2,3-dihydro-1,3-benzoxazole                                                                           |
| 2-[(2-methylimidazo[1,2-a]pyridin-3-yl)carbonyl]hydrazine-1-carboxamide                                                                   |
| N1-[2-(difluoromethoxy)benzylidene]-4-chloroaniline                                                                                       |
| 4-(octyloxy)benzoic acid                                                                                                                  |
| 2-(2,3-dihydro-1,3-benzoxazol-2-yl)-2,3-dihydro-1,3-benzoxazole                                                                           |
| N2-(2,6-dimethoxy-3-pyridyl)-3-bromo-5-chloro-2-thiophenesulfonamide                                                                      |
| N'- {[3-(4-chlorophenyl)-1-phenyl-1H-pyrazol-4-yl]methylene}-2- {[4-phenyl-5-(4-pyridinyl)-4H-1,2,4-triazol-3-yl]sulfanyl} acetohydrazide |
| phenyl 3-aminopyrazine-2-carboxylate                                                                                                      |
| 2-thienyl[3-(trifluoromethyl)-1H-pyrazol-1-yl]methanone                                                                                   |

|                                                                                                                      |
|----------------------------------------------------------------------------------------------------------------------|
| methyl 2-{3-[3-(trifluoromethyl)phenyl]triaz-1-enyl}benzoate                                                         |
| 3-{2-[(4-chlorophenyl)thio]-5-nitrophenyl}-1H-pyrazole                                                               |
| N1-(tert-butyl)-9-oxo-9H-1-fluorene-carboxamide                                                                      |
| 1-phenyl-1H-pyrazole-5-carboxylic acid                                                                               |
| 2-[(4-chlorobenzyl)oxy]-6-fluorobenzonitrile                                                                         |
| ethyl 5-[(2,1,3-benzoxadiazol-4-ylsulfonyl)amino]-2-piperidinobenzoate                                               |
| 3-{{[2-(trifluoromethoxy)phenyl]methylene}amino}oxy]carbonyl} thiophene                                              |
| O1-{3-[2-oxo-3-(trifluoromethyl)-1,2-dihydropyridin-1-yl]propanoyl}-4-(trifluoromethoxy)benzene-1-carbohydroximamide |
| N1-(2,4-difluorobenzyl)-4-fluorobenzamide                                                                            |
| 6,9-dimethoxy-11H-indeno[1,2-b]quinoxalin-11-one                                                                     |
| tert-butyl N-[(1-benzyl-4-piperidiny)methyl]carbamate                                                                |
| <b>(4-benzhydrylpiperazino)(1,5-dimethyl-1H-pyrazol-3-yl)methanone (ccrp2)</b>                                       |
| N-[(4-chlorobenzoyl)oxy](4-chlorophenyl)dioxo-lambda~6~-sulfanecarboximidoyl cyanide                                 |
| 5-chloro-3-{{(2,4-dinitrophenyl)thio}methyl}benzo[b]thiophene                                                        |
| 3-[4-(tert-butyl)-3-({5-[3-(trifluoromethyl)phenyl]-2H-1,2,3,4-tetraazol-2-yl}methyl)phenyl]-1,2,4-oxadiazole        |
| N2-(2,6-dimethoxy-3-pyridyl)-3-bromo-5-chloro-2-thiophenesulfonamide                                                 |
| 5-(2,4-dichlorobenzyl)-2-mercapto-4,6-dimethylnicotinonitrile                                                        |
| 2-(4-fluorophenyl)-5-(4-methyl-1,2,3-thiadiazol-5-yl)-1,3,4-oxadiazole                                               |
| 5-(4-methylphenyl)-1,3-oxazole                                                                                       |
| ethyl 4-{{(2,5-dichloro-3-thienyl)carbonyl}amino}tetrahydro-1(2H)-pyridinecarboxylate                                |
| 3-chloro-N-(2-quinolinyl)-1-benzothiophene-2-carboxamide                                                             |
| N1-[4-(tert-butyl)phenyl]-2-{{5-(4-chloro-1-methyl-1H-pyrazol-3-yl)-4,5-dihydro-1,3,4-thiadiazol-2-yl}thio}acetamide |
| methyl 1-methyl-2-{{3-(trifluoromethyl)anilino}carbonyl}-1-hydrazinecarbodithioate                                   |
| N-(3-cyano-4,5-dihydronaphtho[1,2-b]thiophen-2-yl)acetamide                                                          |
| 5-[4-(tert-butyl)phenyl]-1-phenyl-1H-1,2,4-triazol-3-yl acetate                                                      |
| N1-(3-fluorophenyl)-2-(tert-butyl)hydrazine-1-carbothioamide                                                         |
| 5-isopropyl-3,8-dimethylazulene-1-carbaldehyde 1-(4-nitrophenyl)hydrazone                                            |
| 2-[2-chloro-5-(trifluoromethyl)anilino]-5-methoxybenzoic acid                                                        |
| 1-(2-phenyl-1,3-thiazol-4-yl)ethan-1-one 1-[4-(4-chlorophenyl)-1,3-thiazol-2-yl]hydrazone hydrobromide               |
| N-{2-[(2,4-dichlorobenzyl)thio]ethyl}-4-methyl-1,2,3-thiadiazole-5-carboxamide                                       |
| N1-(3-morpholinopropyl)-2-aminobenzamide                                                                             |
| O1-[(3,5-dimethylisoxazol-4-yl)carbonyl]-2-[3-(trifluoromethyl)-1H-pyrazol-1-yl]ethanehydroximamide                  |
| 4-[[5-[4-(tert-butyl)phenyl]-4H-1,2,4-triazol-3-yl]thio]methyl]-2-methyl-1,3-thiazole                                |
